# Supplementary material
Source: HighWire-hosted journal article supplement (https://www.cmaj.ca/highwire/filestream/59494/field_highwire_adjunct_files/0/150632-res-1-at.pdf)
Supplement: 150632-res-1-at.pdf [file 150632-res-1-at.pdf]

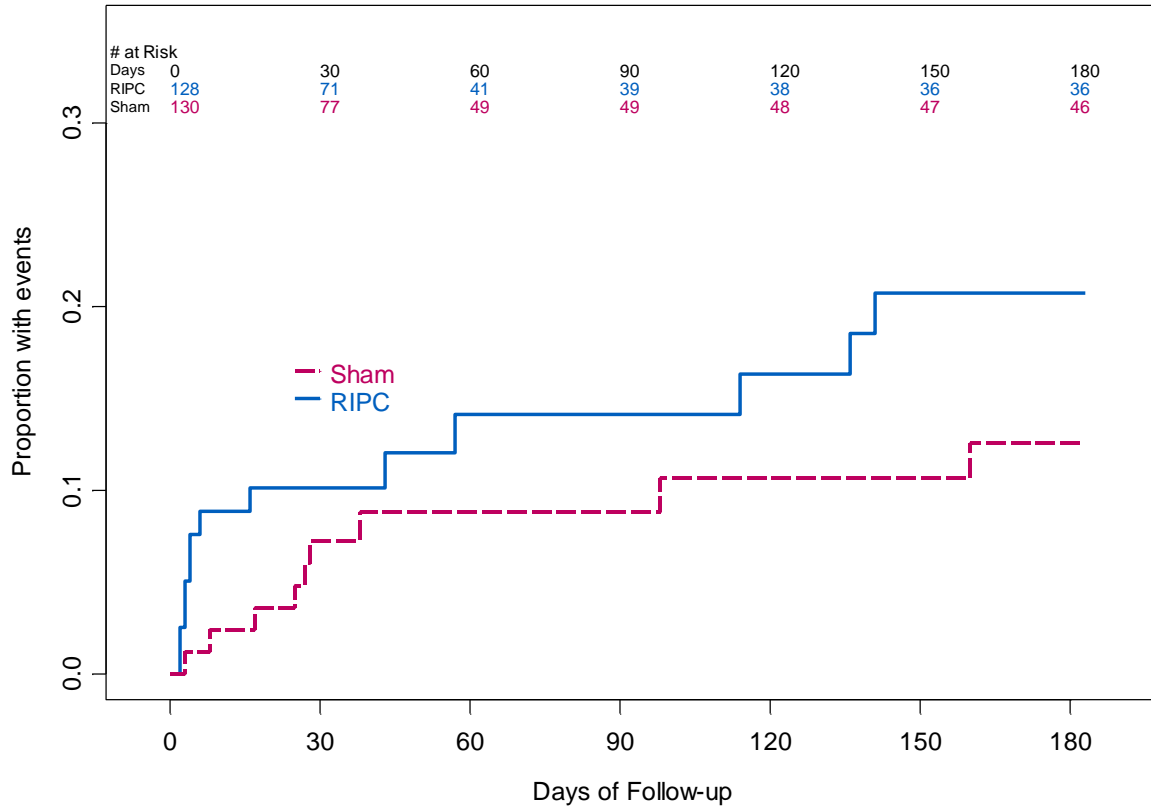

Appendix 1 (as supplied by the authors): Deaths by randomized group.
